# Supplementary material for: NSAID induce apoptosis in human liver cancer cell lines
Source: MDPI journal article supplement (doi:10.3390/cancers13236107), 2003-01-01
Supplement: s1 [file s1]

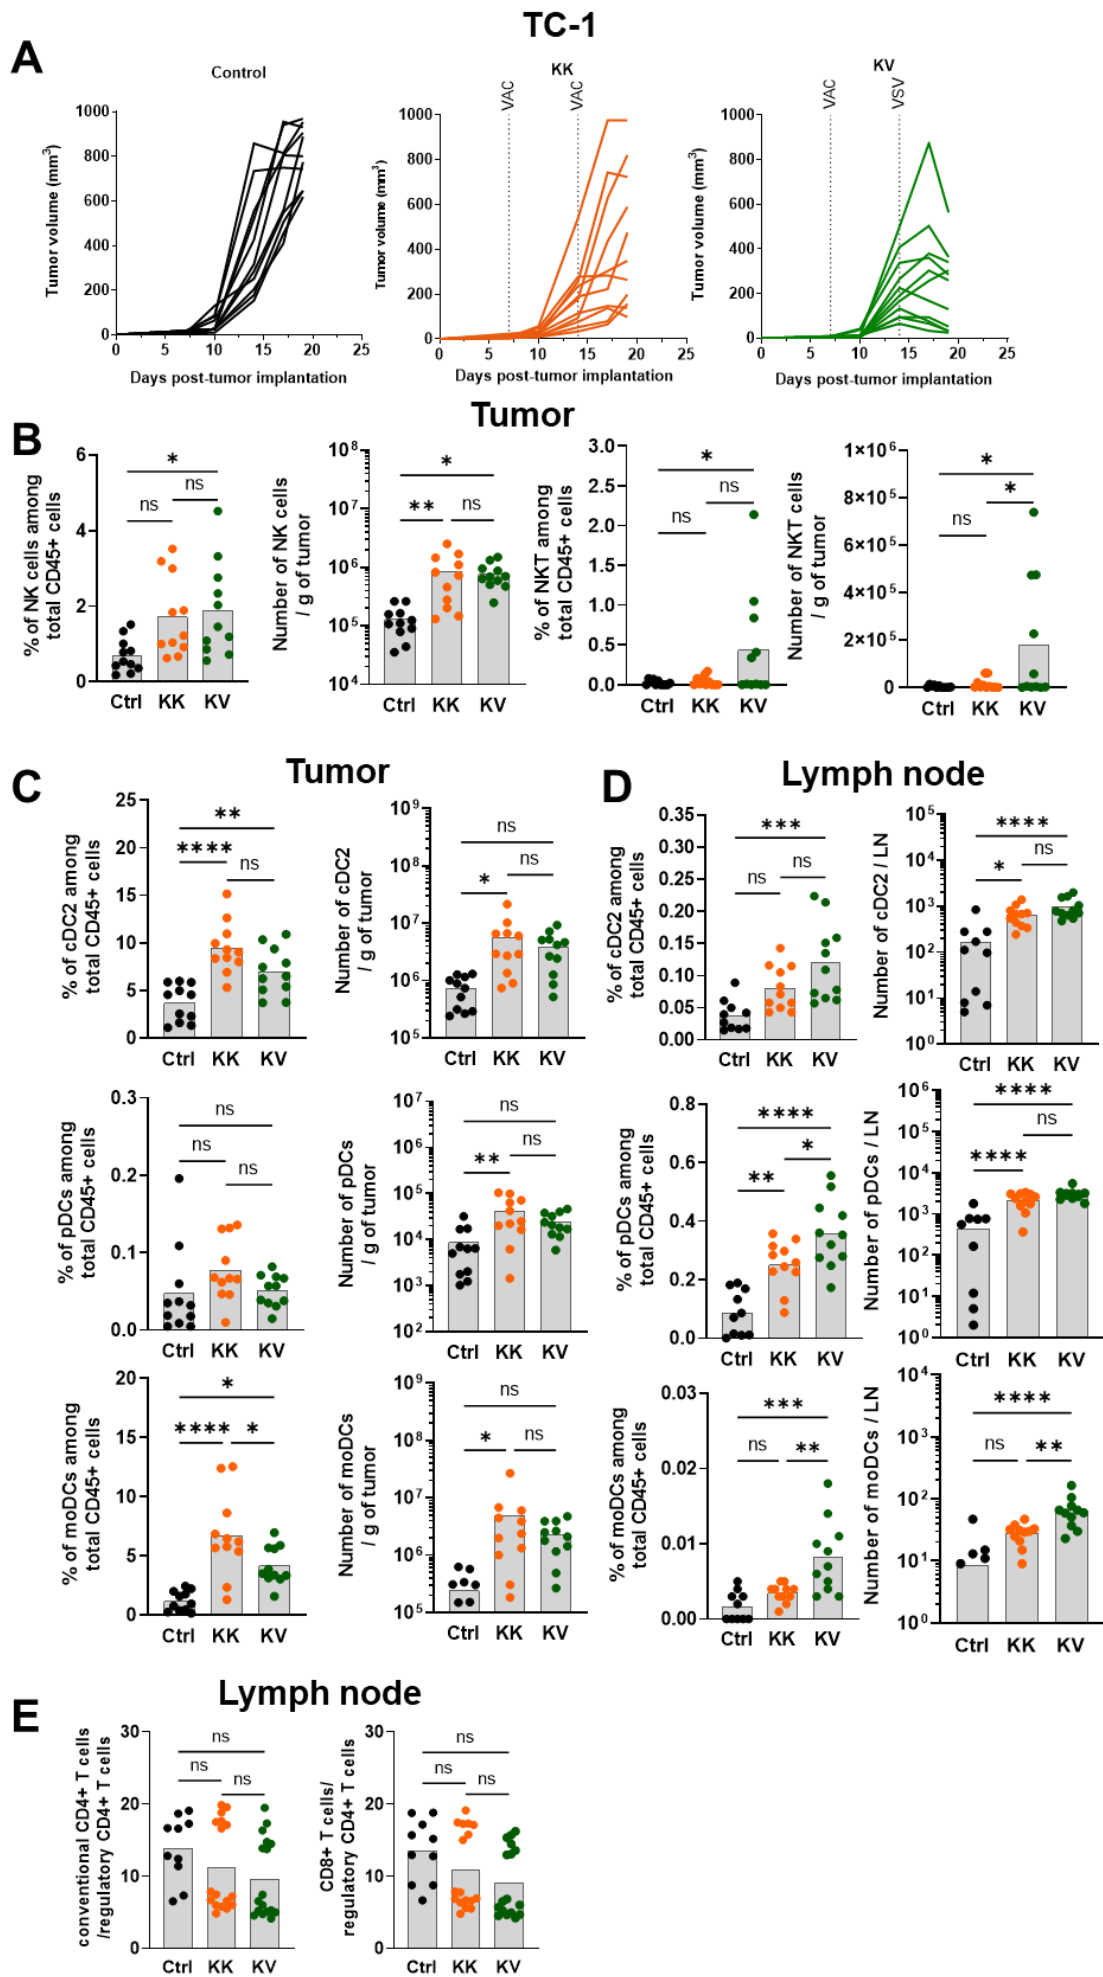

**Figure S1.** Tumor growth curves, intratumoral NK and NKT cells, intratumoral and intranodal dendritic cell characterization and immune cell ratios in TC-1 tumor-bearing C57BL/6 mice. **(A)** Individual TC1 tumor-growth curves in mm<sup>3</sup> post-tumor implantation for untreated (control), homologous KISIMA-Mad25-treated (KK) and heterologous KISIMA-Mad25- and VSV-GP-HPV-treated (KV) groups up to two days before tumor harvest for FACS analysis. **(B)** Frequencies and absolute numbers of tumor-infiltrating NK (left) and NKT (right) cells were analyzed on day 21 post-TC-1 tumor implantation. **(C)** From top to bottom: Frequencies (left) and absolute numbers (right) of tumor-infiltrating cDC2s, pDCs and moDCs on day 18 post-MC-38 tumor implantation. **(D)** From top to bottom: Frequencies (left) and absolute numbers (right) of intranodal cDC2s, pDCs and moDCs on day 18 post-MC-38 tumor implantation. **(E)** Ratio of intranodal Tconv to Treg (left side) or intranodal CD8<sup>+</sup> T cells to Treg derived from TC-1 tumor-bearing mice on day 21 post-tumor implantation. Data in **(A)** to **(E)** are shown as means (grey bar) and are derived from at least two independent experiments. \*  $p < 0.05$ , \*\*  $p < 0.01$ , \*\*\*  $p < 0.001$ , \*\*\*\*  $p < 0.0001$  One-Way ANOVA followed by Tukey's multiple comparison test.

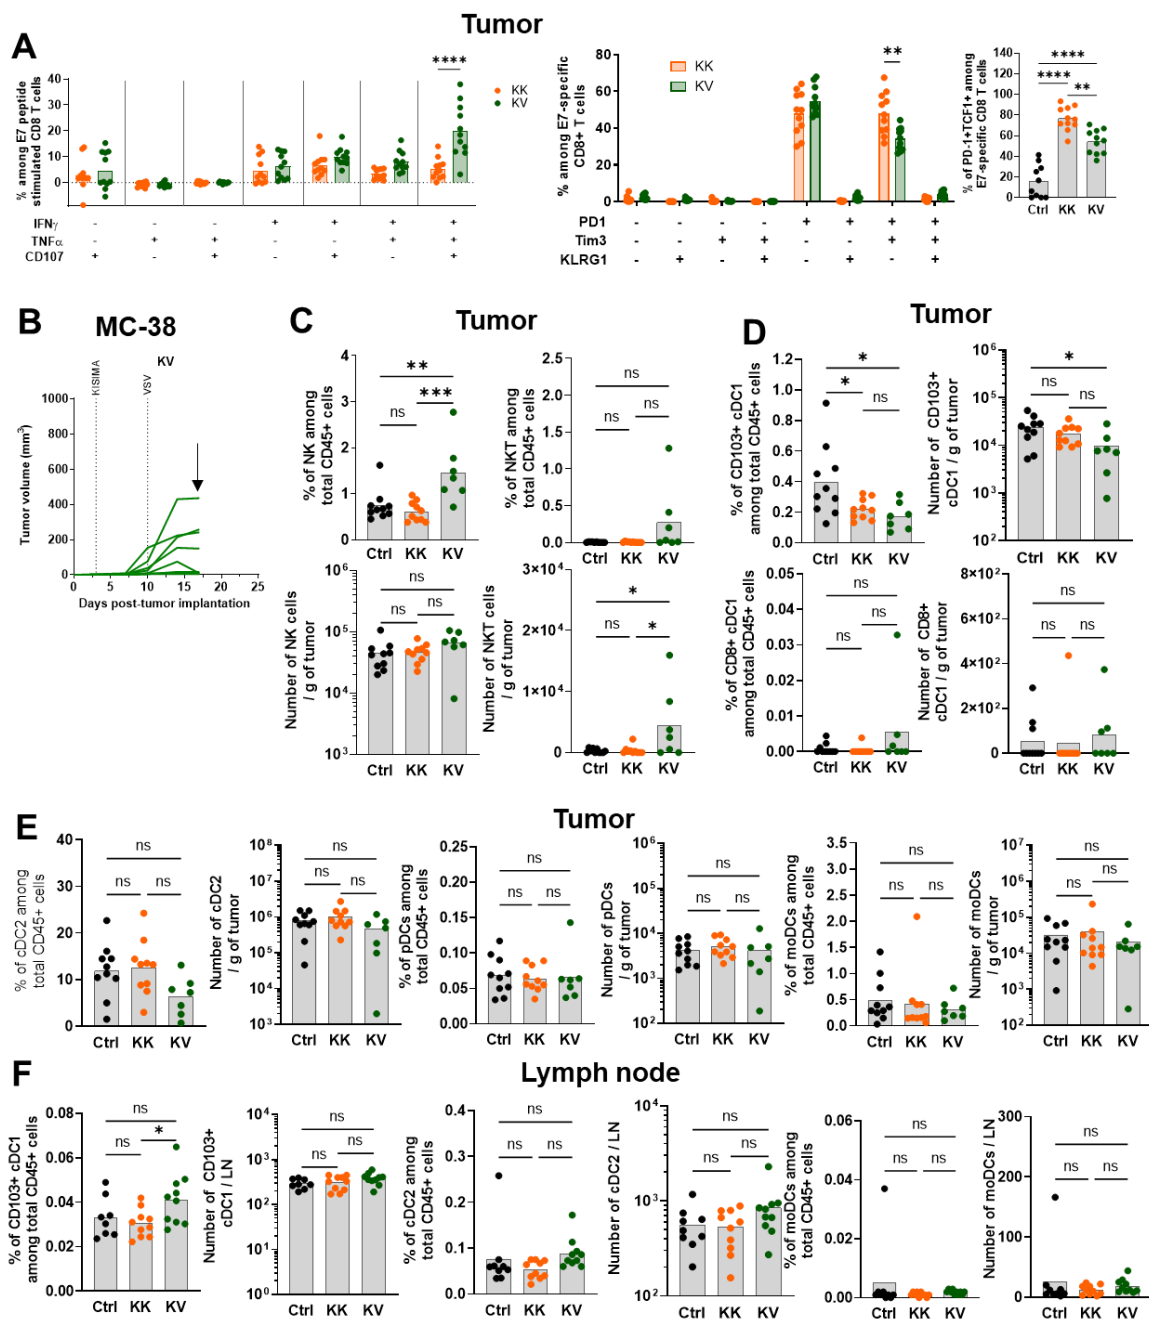

**G**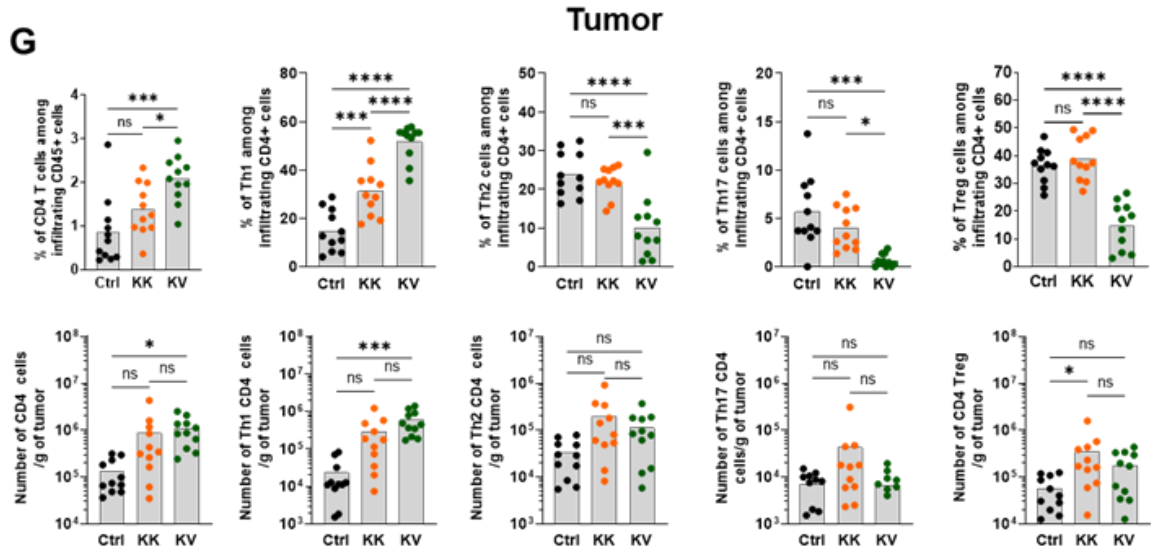**H**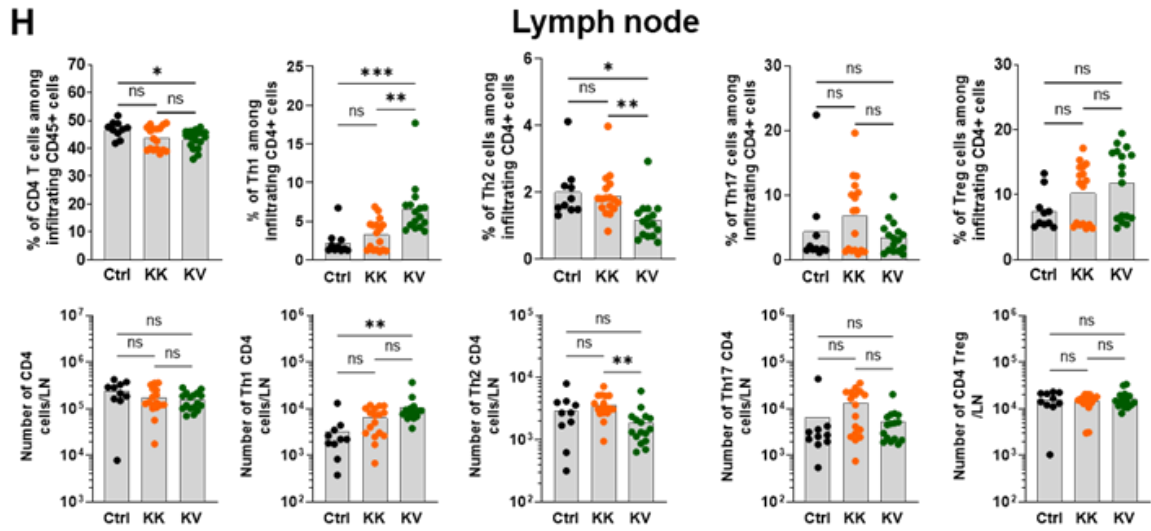

**Figure S2.** CD8+ T-cell characteristics in TC-1 tumor-bearing C57BL/6 mice. Tumor-growth curves, intratumoral NK and NKT cells, intratumoral and intranodal dendritic cell in MC-38 tumor-bearing C57BL/6 mice. (A) Left: Tumor-infiltrating CD8+ T cells were stimulated for 6 hours with E7 peptide and stained for IFN- $\gamma$ , TNF- $\alpha$  and CD107 $\alpha$ . Middle: The exhaustion status was examined on tumor-infiltrating E7-tetramer-positive CD8+ T cells in regards to expression of PD-1, Tim-3 and the effector marker KLRG1. Right: Tumor-derived E7-specific CD8+ T cells were stained for the co-expression of PD-1 and Tcf-1. Tumors were harvested on day 21 post-TC-1 tumor implantation. (B) Individual MC-38 tumor-growth curves in mm<sup>3</sup> post-tumor implantation for heterologous KISIMA-Mad46- and VSV-GP-Mad46-treated (KV) groups two days before tumor harvest (arrow) for FACS analysis. (C) Frequencies (top) and absolute numbers (bottom) of tumor-infiltrating NK (left) and NKT (right) cells were analyzed on day 18 post-MC-38 tumor implantation. (D) Frequencies (left) or absolute numbers (right) of either migratory CD103+ cDC1s (upper graphs) or tissue-resident CD8+ cDC1s (lower graphs) derived from inguinal lymph nodes on day 18 post-MC-38 tumor implantation. (E) From left to right: Frequencies and absolute numbers of tumor-infiltrating cDC2s, pDCs and moDCs on day 18 post-MC-38 tumor implantation. (F) From left to right: Frequencies and absolute numbers of intranodal migratory CD103+ cDC1s, cDC2s and moDCs on day 18 post-MC-38 tumor implantation. (G) From left to right: Frequencies and absolute numbers of tumor-infiltrating CD4 T cells, Th1, Th2, Th17 and Tregs on day 18 post-MC-38 tumor implantation. (H) From left to right: Frequencies and absolute numbers of intranodal CD4 T cells, Th1, Th2, Th17 and Tregs on day 18 post-MC-38 tumor implantation. Data in (A) to (H) are shown as means (grey bar) and are derived from at least two independent experiments. \*  $p < 0.05$ , \*\*  $p < 0.01$ , \*\*\*  $p < 0.001$ , \*\*\*\*  $p < 0.0001$  One-Way ANOVA followed by Tukey's multiple comparison test.

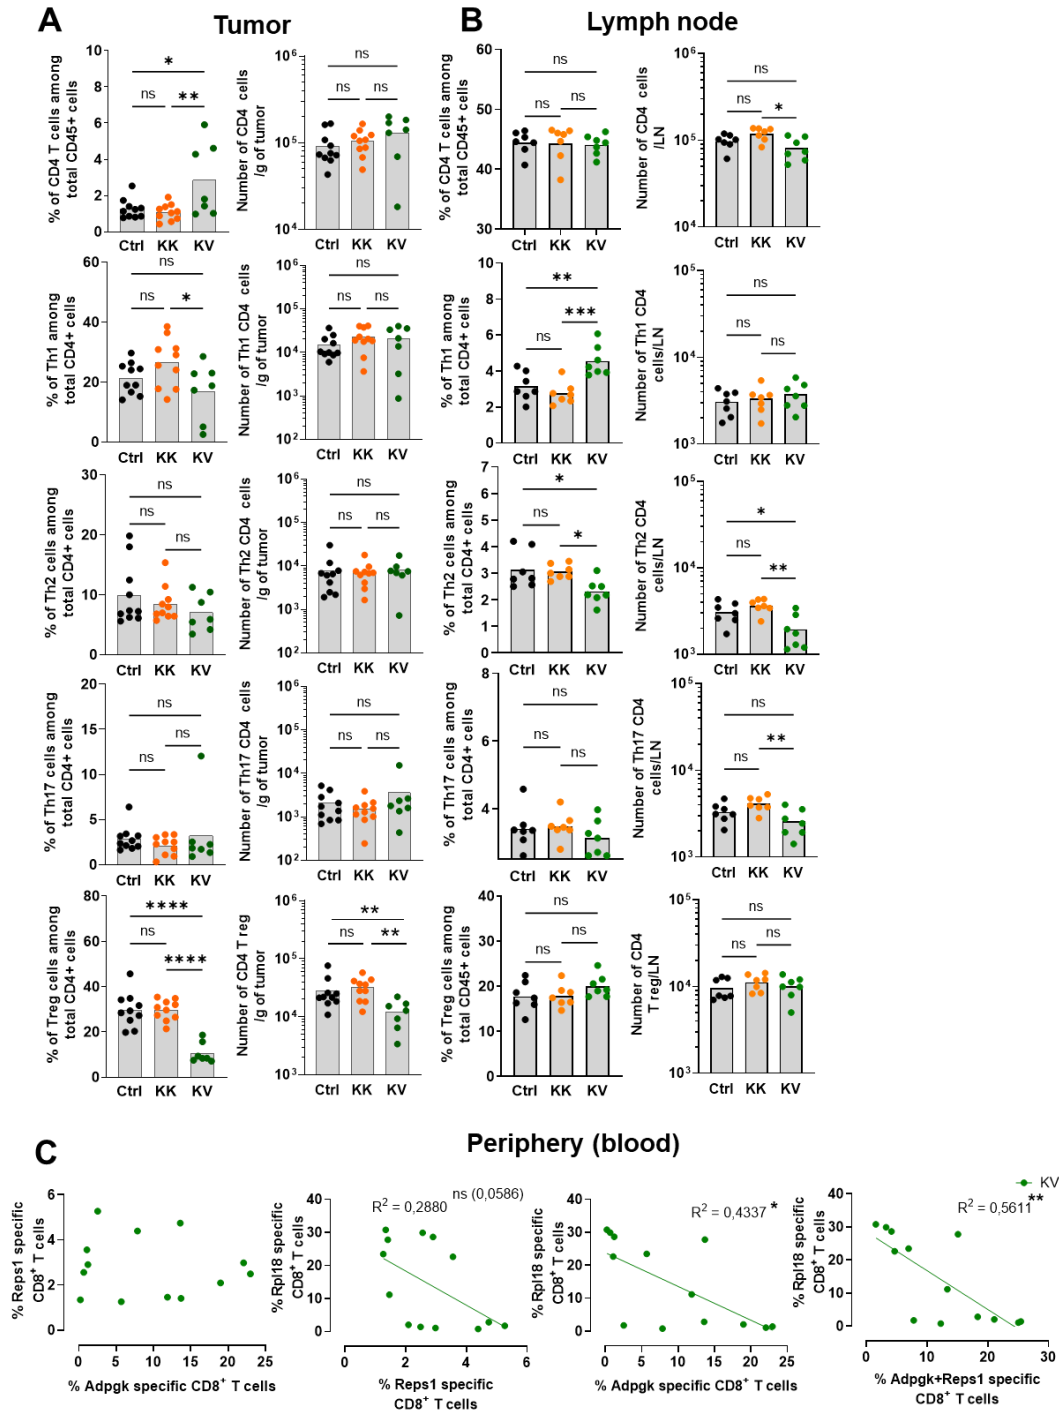

**Figure S3.** CD4<sup>+</sup> T cell characterization of tumor and tumor-dLN and blood Ag correlation graphs in MC-38 tumor-bearing C57BL/6 mice. (A) From top to bottom: Frequencies (left) or numbers (right) of intratumoral CD4<sup>+</sup> T cells, CD4<sup>+</sup> Th1 cells, CD4<sup>+</sup> Th2 cells, CD4<sup>+</sup> Th17 cells or CD4<sup>+</sup> Treg cells on day 18 post-MC-38 tumor implantation. (B) From top to bottom: Frequencies (left) or numbers (right) of intranodal CD4<sup>+</sup> T cells, CD4<sup>+</sup> Th1 cells, CD4<sup>+</sup> Th2 cells, CD4<sup>+</sup> Th17 cells or CD4<sup>+</sup> Treg cells on day 18 post-MC-38 tumor implantation. (C) From left to right: Correlation graphs (KV-treated mice) of blood-derived Rps1-specific CD8<sup>+</sup> T cell % to Adpgk-specific CD8<sup>+</sup> T cell %, blood-derived Rpl18-specific CD8<sup>+</sup> T cell % to Rps1-specific CD8<sup>+</sup> T cell %, blood-derived Rpl18-specific CD8<sup>+</sup> T cell % to Adpgk-specific CD8<sup>+</sup> T cell % and blood-derived Rpl18-specific CD8<sup>+</sup> T cell % to the sum of Rps1- and Adpgk-specific CD8<sup>+</sup> T cell % on day 17 post-MC-38 tumor implantation. Data in (A) and (B) are shown as means (grey bar), (A) is derived from two independent experiments and (B) from one experiment. \*  $p < 0.05$ , \*\*  $p < 0.01$ , \*\*\*  $p < 0.001$ , \*\*\*\*  $p < 0.0001$  One-Way ANOVA followed by Tukey's multiple comparison. Data in C) are derived from two independent experiments. \*  $p < 0.05$ , \*\*  $p < 0.01$  are calculated with simple linear regression.

**A**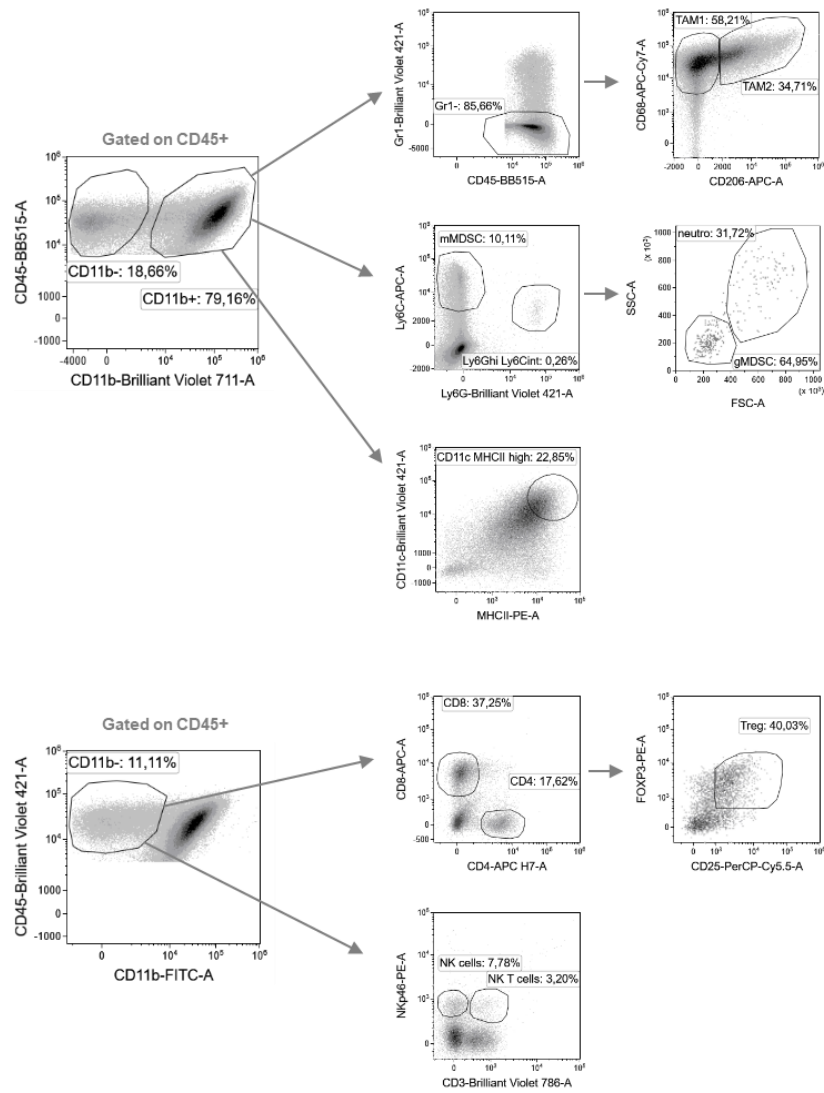**B**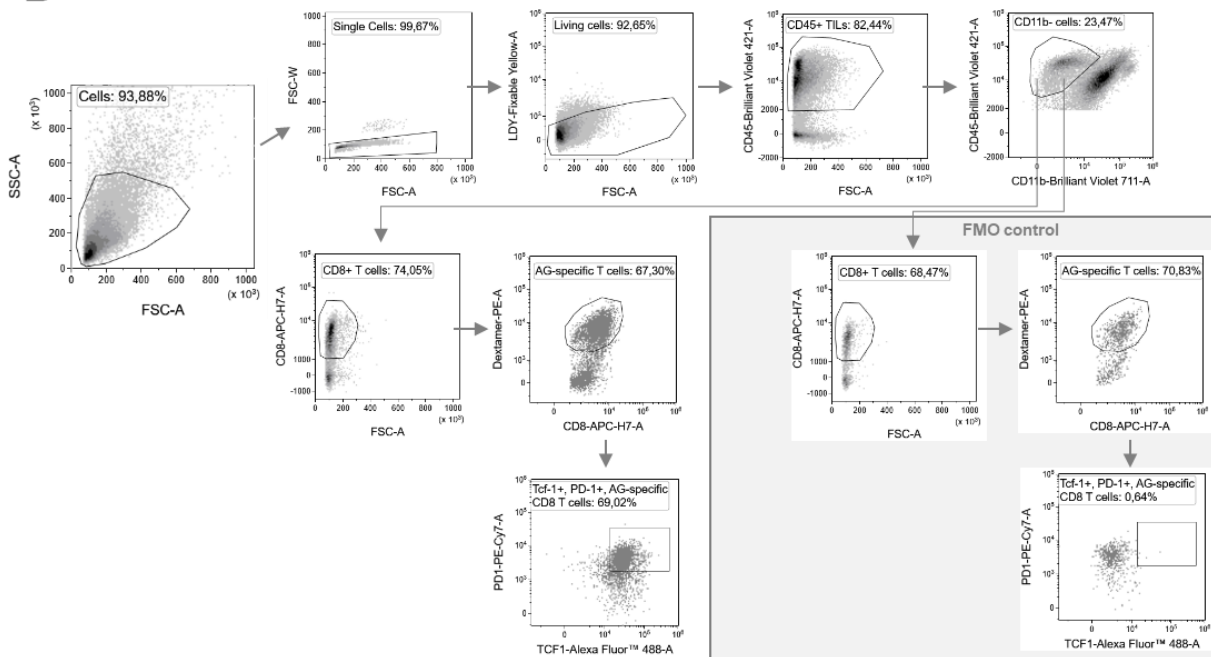

**Figure S4. TIL characterization and Tcf1<sup>+</sup>/PD-1<sup>+</sup> CD8<sup>+</sup> T-cell stemness gating strategies. (A) FACS gating strategy for the in-depth TIL characterization. (B) FACS gating strategy for the detection of Tcf1<sup>+</sup>/PD-1<sup>+</sup> antigen-specific CD8<sup>+</sup> T cells.**



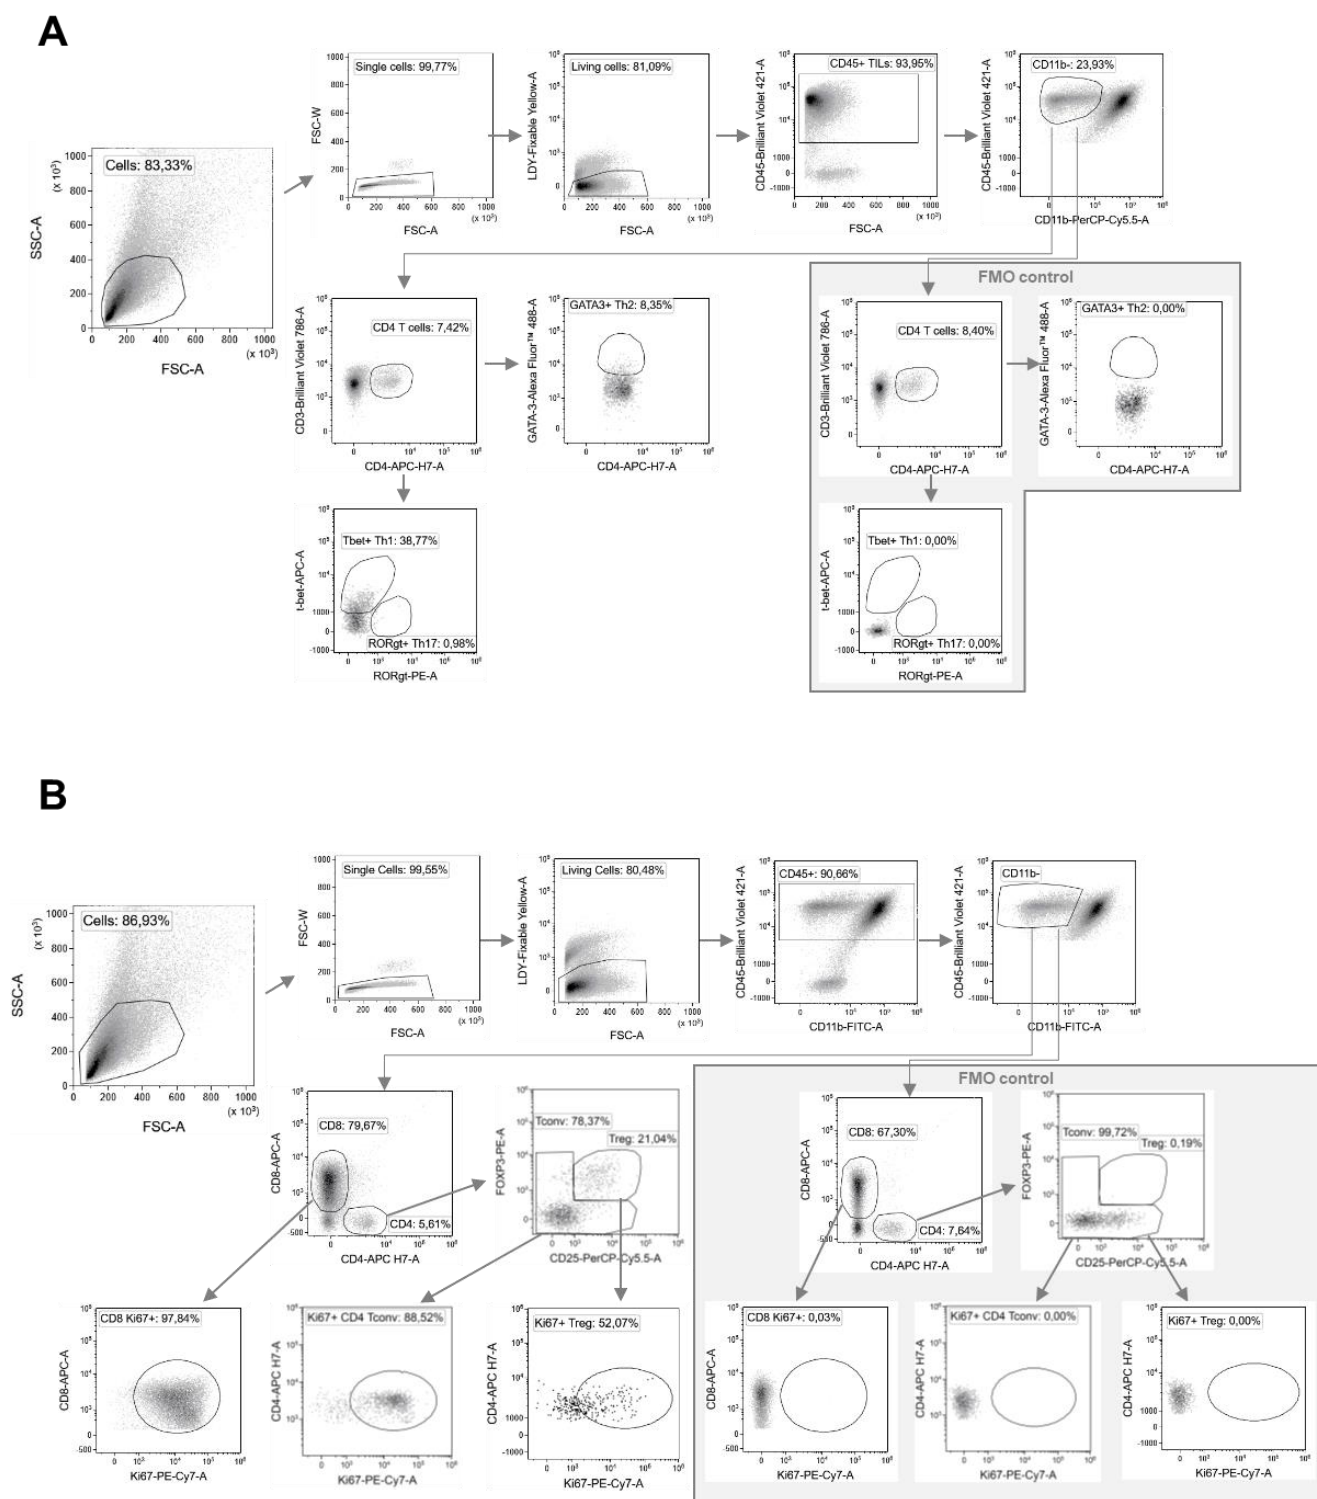

**Figure S5.** CD4<sup>+</sup> T-helper and CD4<sup>+</sup> regulatory T-cell gating strategies. (A) FACS gating strategy for the characterization of Th1, Th2 and Th17 CD4<sup>+</sup> cells. (B) FACS gating strategy for the detection of CD4<sup>+</sup> regulatory T cells and the investigation of proliferation via the proliferation marker Ki67.

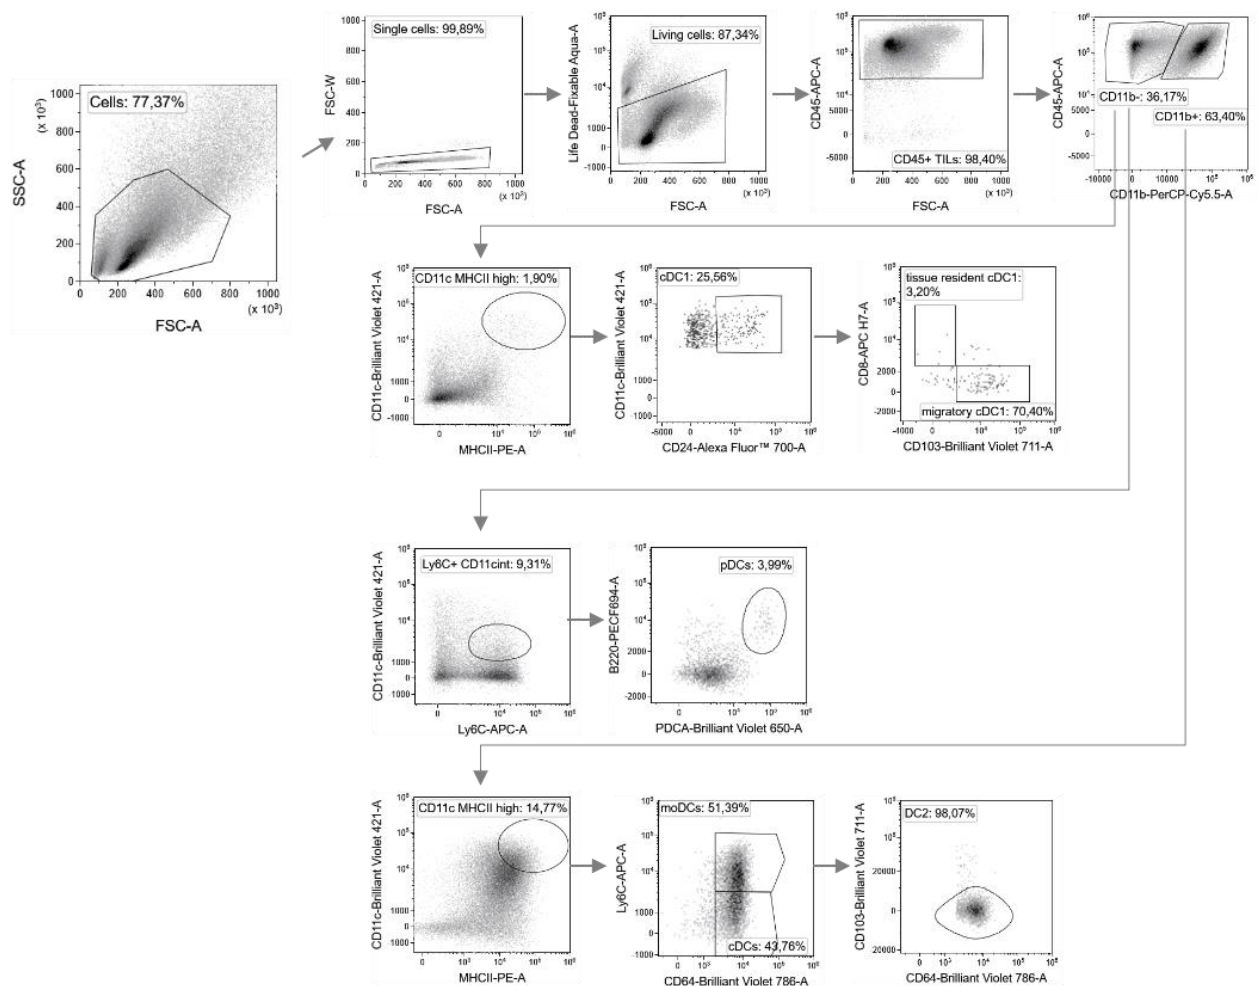

**Figure S6. DC characterization gating strategies.** FACS gating strategies for the characterization of tissue-resident CD8+ cDC1s, migratory CD103+ cDC1s, moDCs, cDC2s and pDCs.



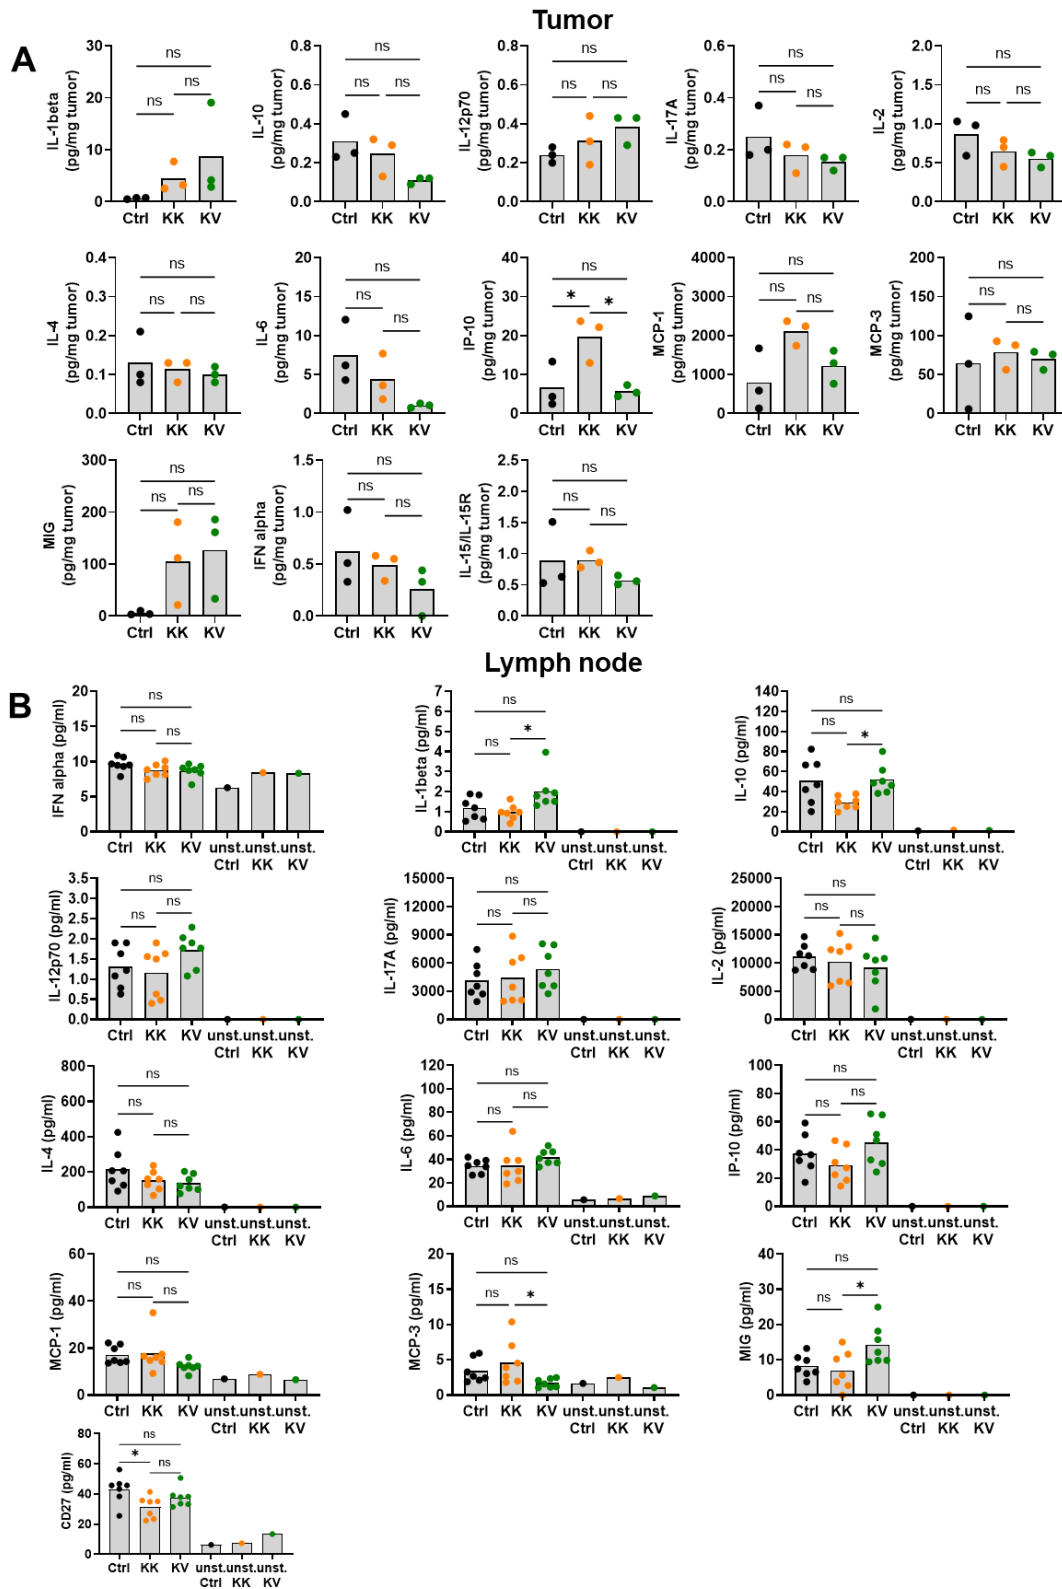

**Figure S7. Cytokine concentrations from tumor and tumor-dLNs of TC-1 tumor-bearing C57BL/6 mice.** (A) Cytokine (IL-1beta, IL-10, IL-12p70, IL-17A, IL-2, IL-4, IL-6, IP-10, MCP-1, MCP-3, MIG, IFN- $\alpha$ , IL-15/IL-15R) concentrations in pg/mL derived from tumor lysates that were harvested on day 21 post-tumor implantation and measured by Luminex. (B) Cytokine (IFN- $\alpha$ , IL-1beta, IL-10, IL-12p70, IL-17A, IL-2, IL-4, IL-6, IP-10, MCP-1, MCP-3, MIG, CD27) concentrations in pg/mL derived from inguinal lymph node cell suspension supernatants 24 hours after re-stimulation with  $\alpha$ -CD3/ $\alpha$ -CD28 beads or respective controls, which were harvested on day 21 post-tumor implantation and measured by Luminex. Data in (A) and (B) are shown as means (grey bar) and are derived from one experiment. \*  $p < 0.05$  One-Way ANOVA followed by Tukey's multiple comparison test.

**Table S1.** Mean values and statistical analysis of TIL characterization from Figure 4C on day 18 post-MC-38 tumor implantation. Statistical analysis was performed using One-Way ANOVA followed by Tukey's multiple comparison test.

| Tumor        | Mean % ( $\pm$ SD) |                |                | <i>p</i> -value |               |               |
|--------------|--------------------|----------------|----------------|-----------------|---------------|---------------|
|              | Ctrl               | KK             | KV             | Ctrl vs KK      | Ctrl vs KV    | KK vs KV      |
| CD8+ T cells | 3.6<br>(2.6)       | 4.3<br>(1.9)   | 42.6<br>(23.6) | 0.9893          | <0.0001       | <0.0001       |
| CD4+ Tregs   | 0.4<br>(0.3)       | 0.4<br>(0.13)  | 0.36<br>(0.37) | 0.991           | 0.9274        | 0.965         |
| CD4+ Tconv   | 1.04<br>(0.17)     | 0.93<br>(0.18) | 2.75<br>(1.63) | 0.9503          | <b>0.001</b>  | <b>0.0005</b> |
| mMDSCs       | 9.5<br>(4.8)       | 7.3<br>(4.1)   | 5.22<br>(3.15) | 0.4661          | 0.1123        | 0.5793        |
| gMDSCs       | 0.38<br>(0.37)     | 0.15<br>(0.12) | 0.19<br>(0.24) | 0.1646          | 0.3499        | 0.9526        |
| Neutrophils  | 0.22<br>(0.18)     | 0.08<br>(0.04) | 0.05<br>(0.04) | <b>0.0309</b>   | <b>0.0188</b> | 0.8837        |
| TAM1         | 33.3<br>(13.1)     | 42.3<br>(11.7) | 20.7<br>(12.7) | 0.2636          | 0.1248        | <b>0.0052</b> |
| TAM2         | 41.5<br>(13.9)     | 35.7<br>(13.1) | 24.2<br>(12.4) | 0.5973          | <b>0.0371</b> | 0.2083        |
| NKT          | 0<br>(0)           | 0<br>(0)       | 0.27<br>(0.47) | 0.9999          | 0.0672        | 0.0672        |
| NK           | 0.74<br>(0.33)     | 0.61<br>(0.22) | 1.46<br>(0.67) | 0.7568          | <b>0.0046</b> | <b>0.0009</b> |
| B            | 0.46<br>(0.25)     | 0.36<br>(0.21) | 0.68<br>(0.91) | 0.9035          | 0.6597        | 0.4268        |
| DCs          | 12.8<br>(6.3)      | 13.2<br>(6.5)  | 6.98<br>(4.39) | 0.9857          | 0.1372        | 0.1042        |

**Table S2.** Antibodies and Co-Stimulators.

| Antibody specificity                 | Clone                                               | Manufacturer      |
|--------------------------------------|-----------------------------------------------------|-------------------|
| CD45                                 | 30-F11                                              | BD                |
| CD11b                                | M1/70                                               | BD                |
| PD1                                  | 29F.1A12                                            | Biologend         |
| CD8                                  | 53-6.7                                              | BD                |
| KLRG1                                | 2F1                                                 | BD                |
| Tim3                                 | B8.2C12                                             | Biologend         |
| CD103                                | M290                                                | BD                |
| CD49a                                | Ha31/8                                              | BD                |
| Ly6C                                 | AL-21                                               | BD                |
| Ly6G                                 | 1A8                                                 | BD                |
| PD-L1                                | 10F.9G2                                             | Biologend         |
| CD103                                | M290                                                | BD                |
| MHCII                                | 2D4                                                 | BD                |
| CD11c                                | HL3                                                 | BD                |
| CD40                                 | HM40-3                                              | eBioscience       |
| B220                                 | RA3-6B2                                             | BD                |
| CD24                                 | M1/69                                               | BD                |
| CD64                                 | X54-5/7.1                                           | BD                |
| Pdca                                 | 927                                                 | BD                |
| CD4                                  | RM4-5                                               | BD                |
| CD4                                  | GK1-5                                               | BD                |
| CD25                                 | PC61.5                                              | TONBO Biosciences |
| FoxP3                                | FJK-16s                                             | eBioscience       |
| Ki67                                 | solA15                                              | eBioscience       |
| Gr1                                  | RB6-8C5                                             | BD                |
| LAP (TGF-beta)                       | TW 7-16B4                                           | BioLegend         |
| CD3                                  | 500A2                                               | BD                |
| CD335 (NKp46)                        | 29A1.4                                              | BD                |
| CD206                                | C068C2                                              | BioLegend         |
| CD68                                 | Fa-11                                               | BioLegend         |
| T-bet                                | eBio4B10 (4B10)                                     | eBioscience       |
| GATA-3                               | TWAJ                                                | eBioscience       |
| RORgt                                | AFKJS-9                                             | eBioscience       |
| CD69                                 | H1.2F3                                              | BD                |
| TNFa                                 | MP6-XT22                                            | BD                |
| IFNg                                 | XMG1.2                                              | BD                |
| IL-2                                 | JES6-5H4                                            | BD                |
| Isotype rat IgG1k                    | R3-34                                               | BD                |
| Isotype rat IgG1k                    | G234-2356                                           | BD                |
| Isotype rat IgG2bk                   | A95-1                                               | BD                |
| Anti-mouse CD28 (for co-stimulation) | Mouse EL-4 (T-cell lymphoma Cells)                  | BD                |
| Anti-mouse CD3e (for co-stimulation) | H-2Kb-specific cytotoxic T lymphocyte clone BM10-37 | BD                |

**Table S3.** Multimers.

| Multimers                                  | Cat. N°   | Manufacturer  |
|--------------------------------------------|-----------|---------------|
| E7 MHC dextramer (H-2Db RAHYNIVTF - PE)    | JA2195-PE | Immudex       |
| Adpgk MHC dextramer (H-2Db ASMTNMELM - PE) | JA3803-PE | Immudex       |
| Reps1 MHC tetramer (H2-Db AQLANDVVL - PE)  | TB-5114-1 | MBL           |
| Rpl18 MHC tetramer (H2-Kb KILTFDRL - PE)   | MKb-017   | Tetramer Shop |
